# Supplementary material
Source: Research Square preprint supplement (doi:10.21203/rs.3.rs-8962549/v1)
Supplement: Supplementary file 1 [file caef531874832ef448c90f8f.docx]

**A 3D-QSAR-based interaction analysis of Quinazoline derivatives for promising antitumor activity.**

Shan He a **‡,** Chen Tang a **‡**, Zhenhua Liu a **‡**, Lingyan Yang a, Lei Shi

a, Jiding Liao a,*and Yunmei Liu a,*

a College of Mathematics and Physics, School of Pharmaceutical Science, University of South China，Hengyang City, Hunan Province, 421001, P.R. China

**‡** Shan He,Chen Tang and Zhenhua Liu contributed equally to this paper.

⁎Corresponding authors.

E-mail address: lymhsm@126.com

**Abstract:** Quinazoline compounds have significant scientific implications and can be employed as tyrosine kinase inhibitors to treat cancer. A reasonable three-dimensional quantitative conformational relationship (3D-QSAR) model for quinazoline compounds was constructed using comparative molecular analysis (CoMFA) and comparative molecular similarity index analysis (CoMSIA) methods in order to obtain quinazoline compounds with good anti-tumor activity. The outcomes demonstrate the strong predictability and stability of the CoMFA and CoMSIA models(CoMFA: q2=0.752,r2=0.990,SEE=0.098, F=322.061; CoMSIA: q2=0.748, r2=0.991, SEE=0.095, F=286.959). The anti-tumor activity of the compound is benefited by the presence of large and hydrophilic negatively charged groups at the 6-position substitution site, according to the 3D-QSAR model analysis. The anti-tumor activity of the compound can also be enhanced by the presence of small volume hydrogen bonding receptor groups at the substitution sites of positions 4 and 7. Furthermore, hydrophobicity at position 4 is more beneficial, while hydrophobicity at position 7 is the opposite. The 3D-QSAR research results offer some theoretical groundwork for future structural modifications of quinazoline molecules.

**Keywords:** Quinazoline; Anti tumor; CoMFA; CoMSIA; 3D-QSAR.


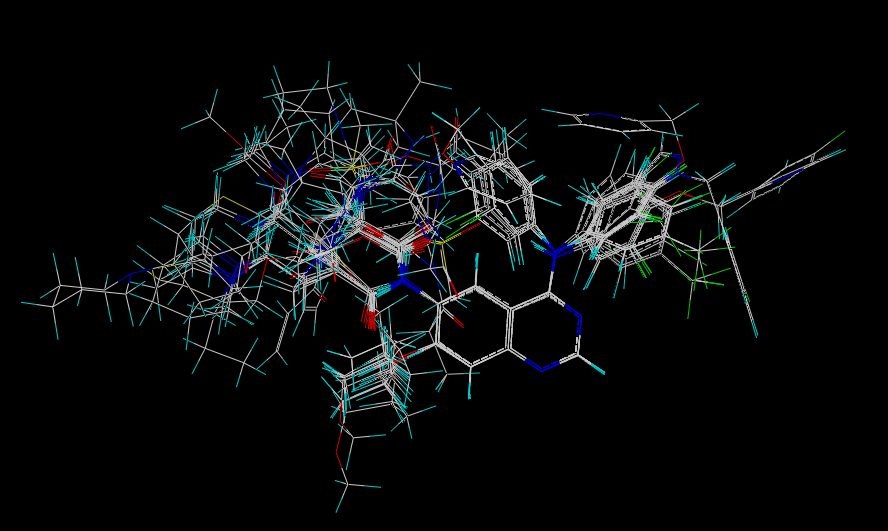


Fig. S1 Alignment of the training set

**
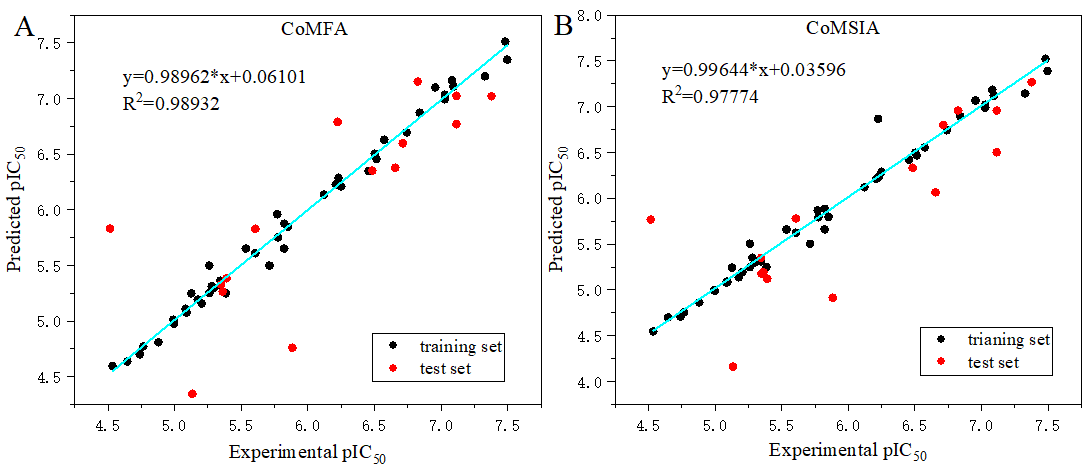
**

Fig. S2 CoMFA(A), CoMSIA(B) models pIC50 and predicted value correlation ftting diagram


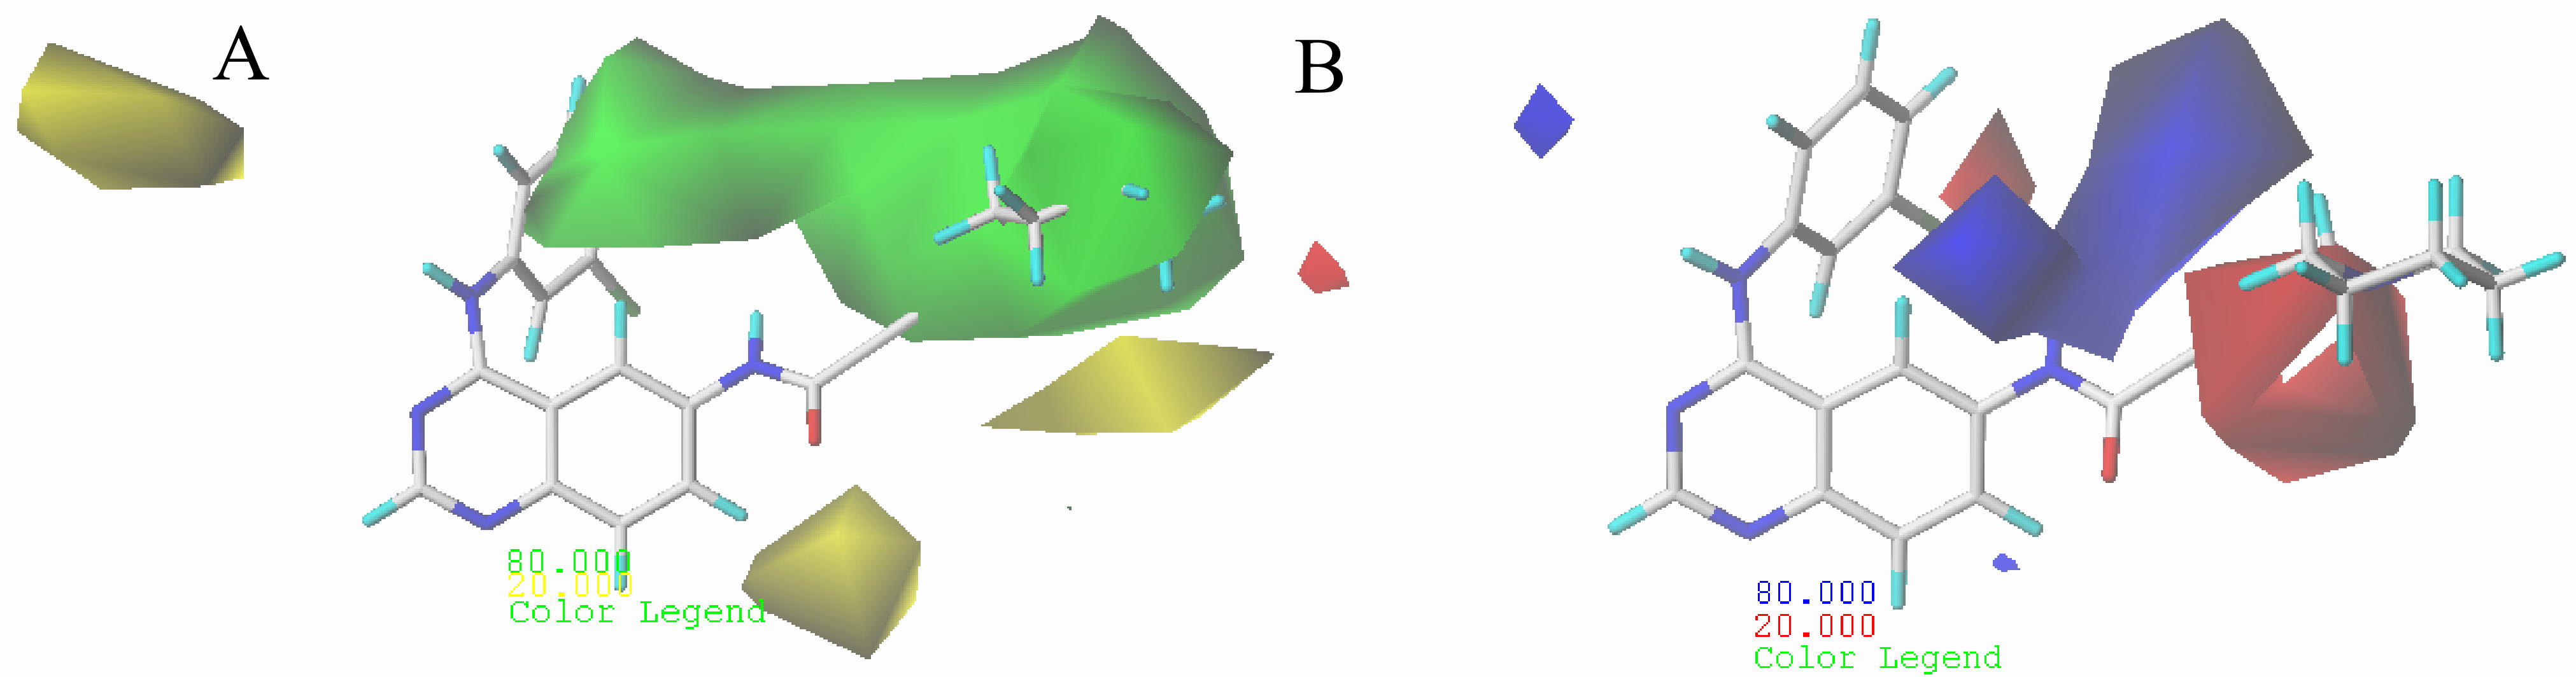


Fig.S3 Isopotential diagrams of steric field (A) and electrostatic field (B) in the CoMSIA model


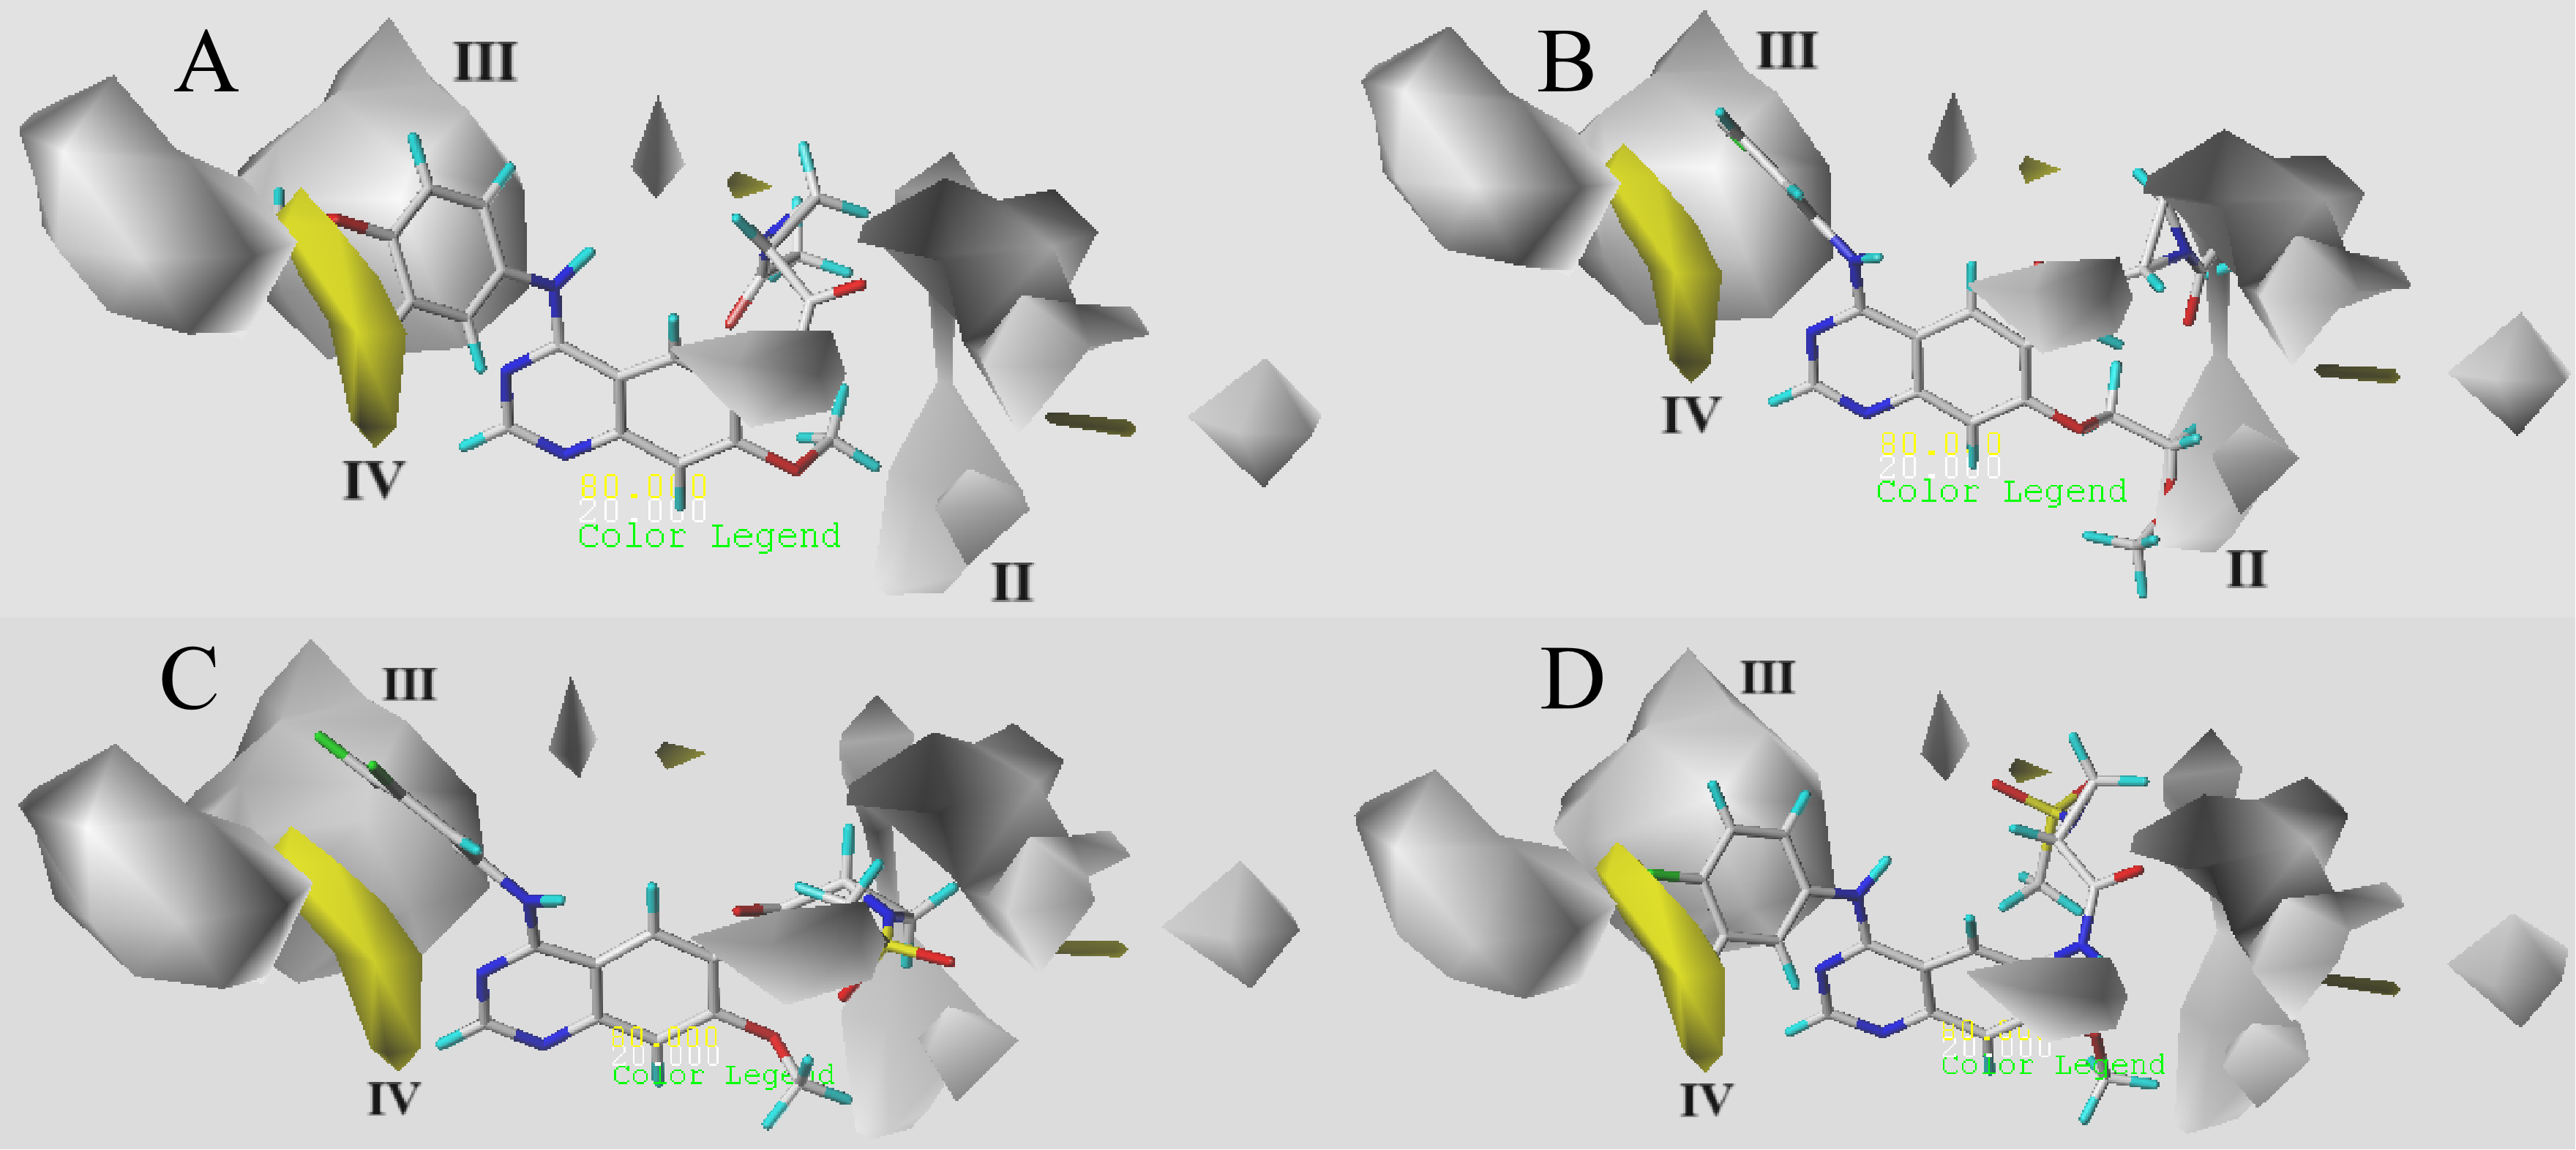


Fig.S4 Hydrophobic field equipotential diagrams of compounds TKI-47 (A), TKI-45 (B), TKI-52 (C), and TKI-59 (D) in the CoMSIA model


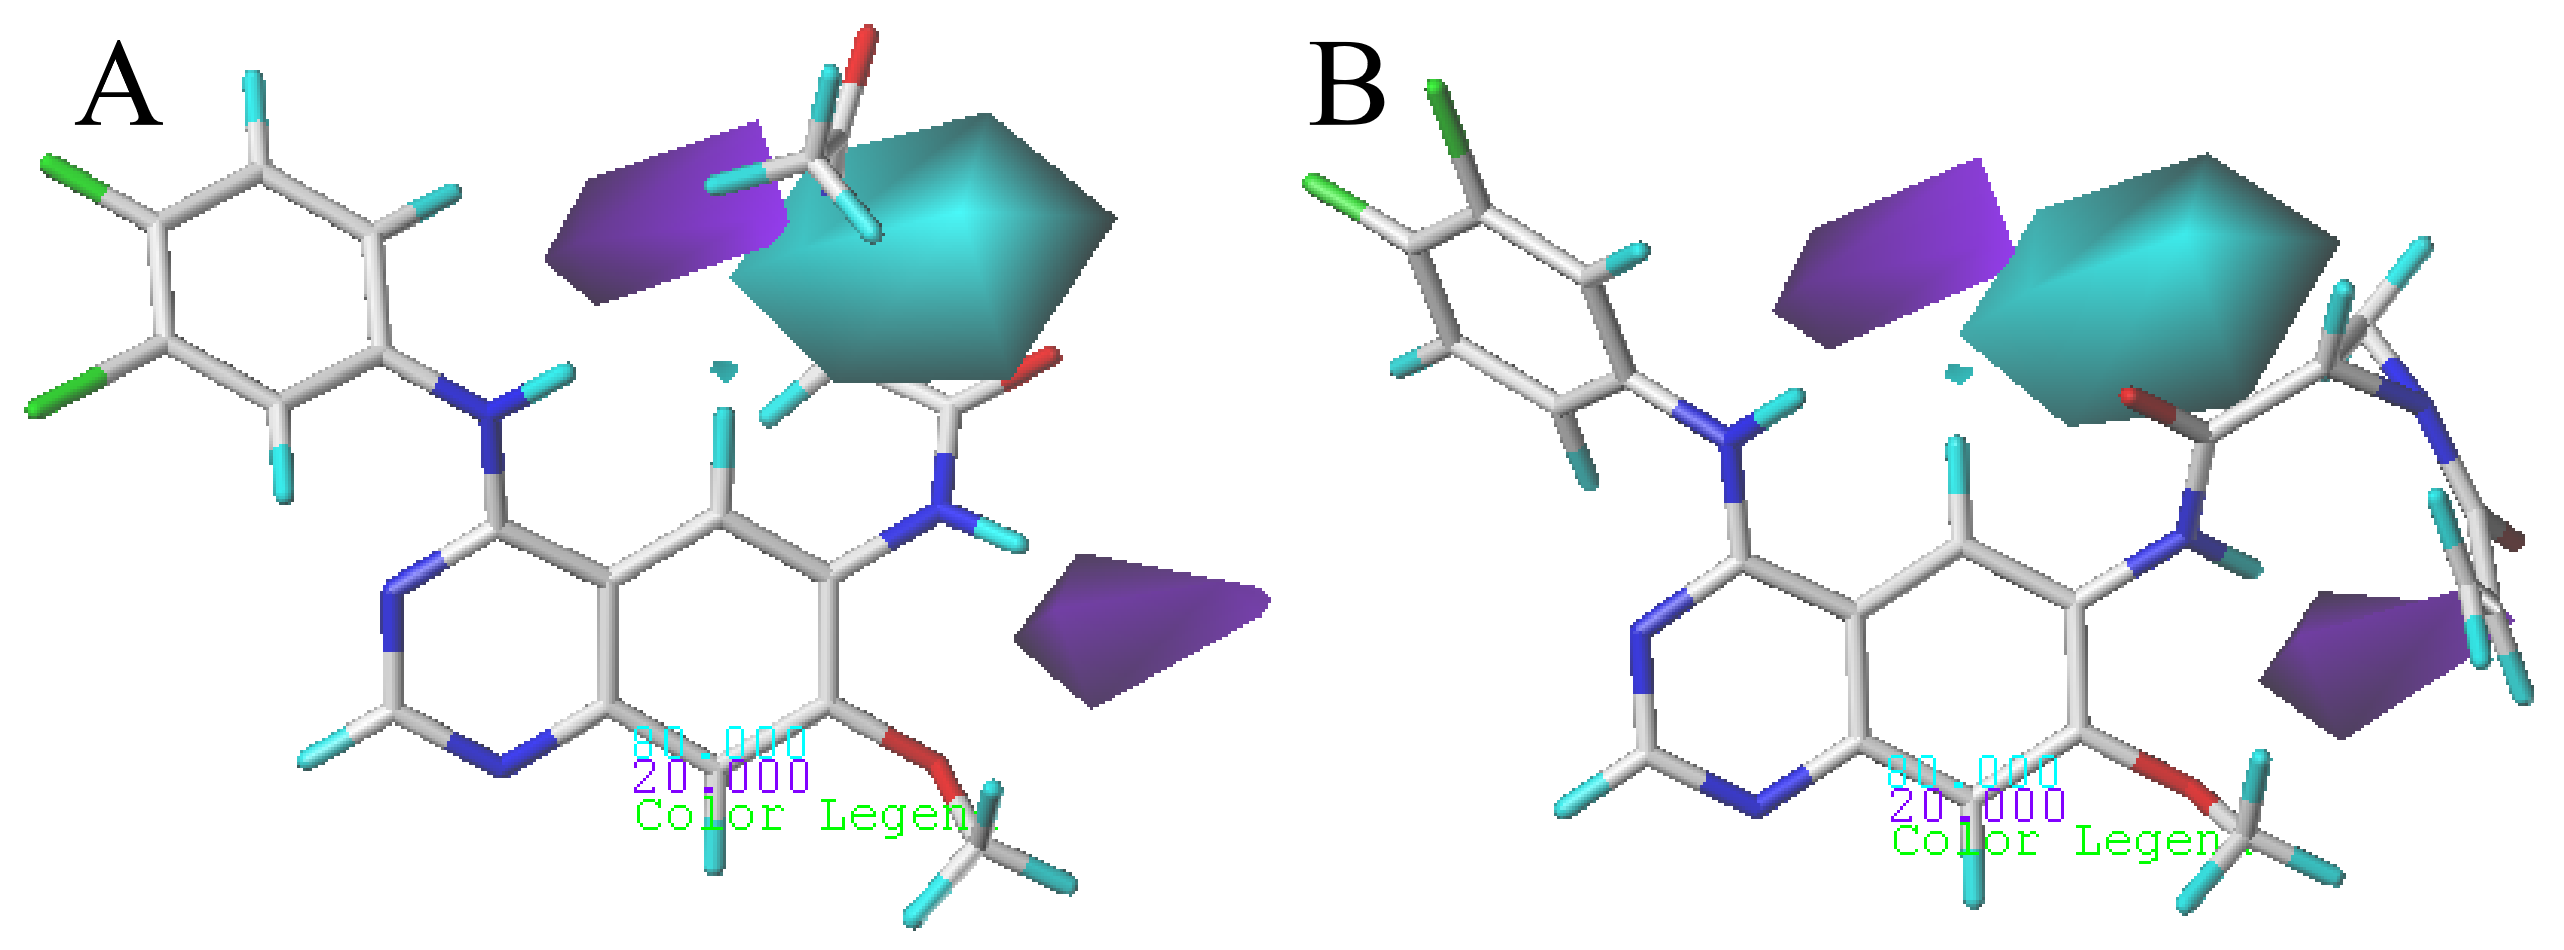


Fig.S5 Isopotential diagrams of hydrogen bond donor fields for compounds TKI-19 (A) and TKI-20 (B) in the CoMSIA model


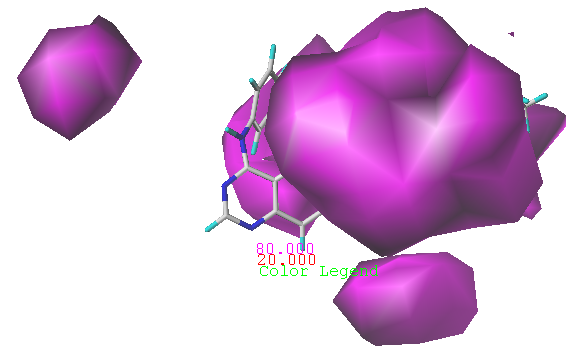


Fig.S6 Isopotential diagram of the hydrogen bond acceptor field based on the CoMSIA model of training set compounds.

|  |  |
| --- | --- |
|  |  |
|  |  |
|  |  |
| Fig.S7 The chemical structure of the target compound | |


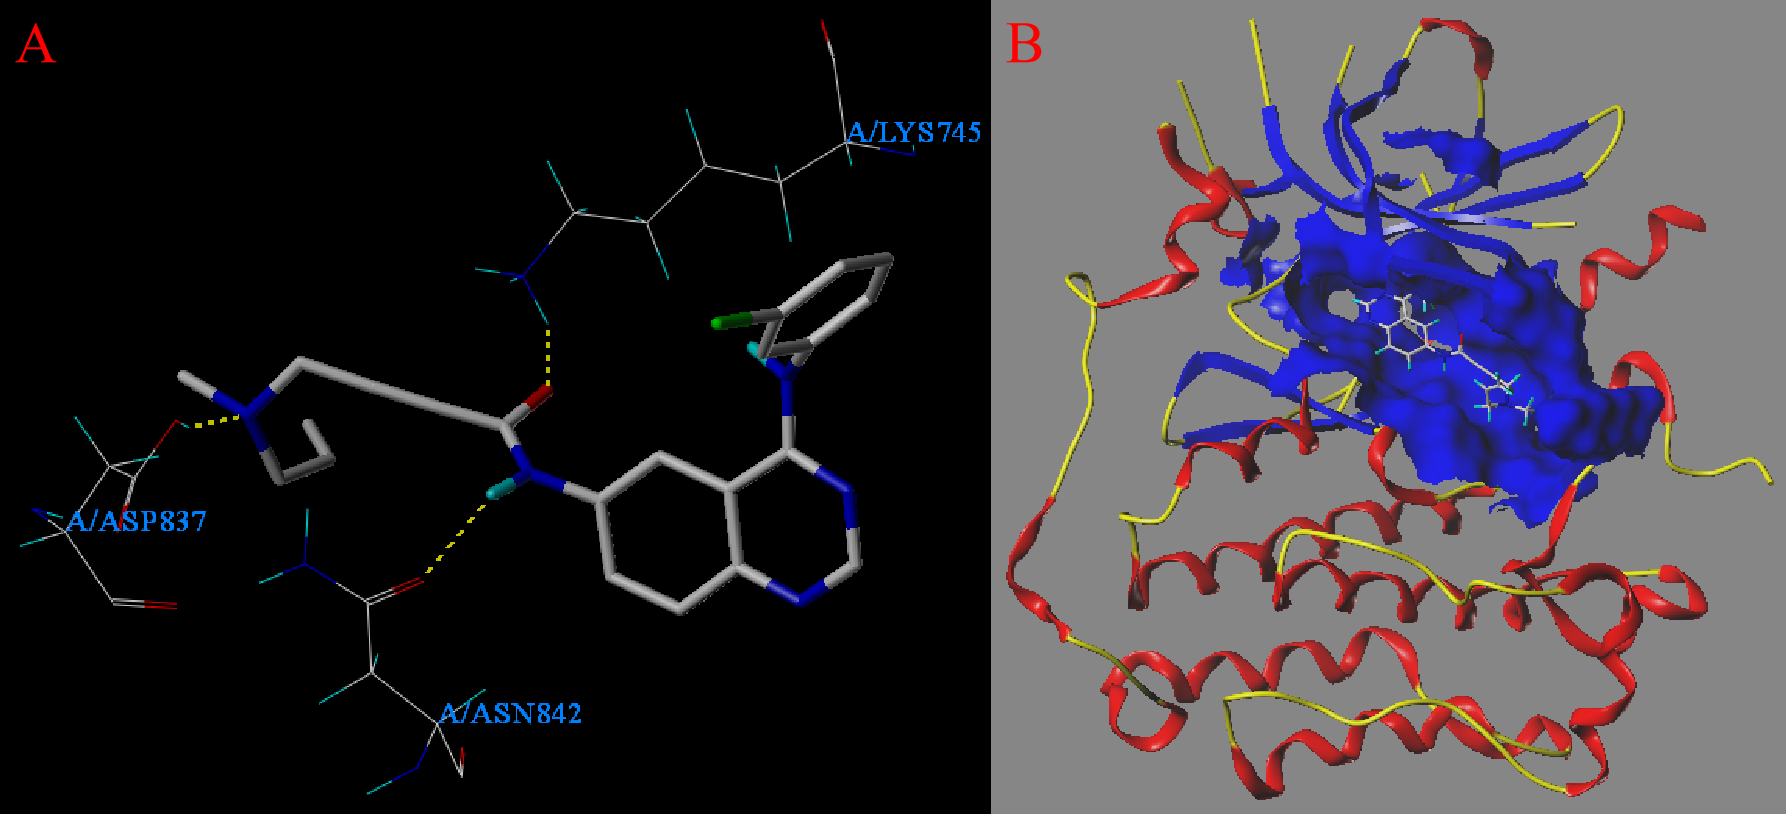


Fig.S8 Active site map (A) and active pocket coverage map (B) of compound 10F docking 3POZ


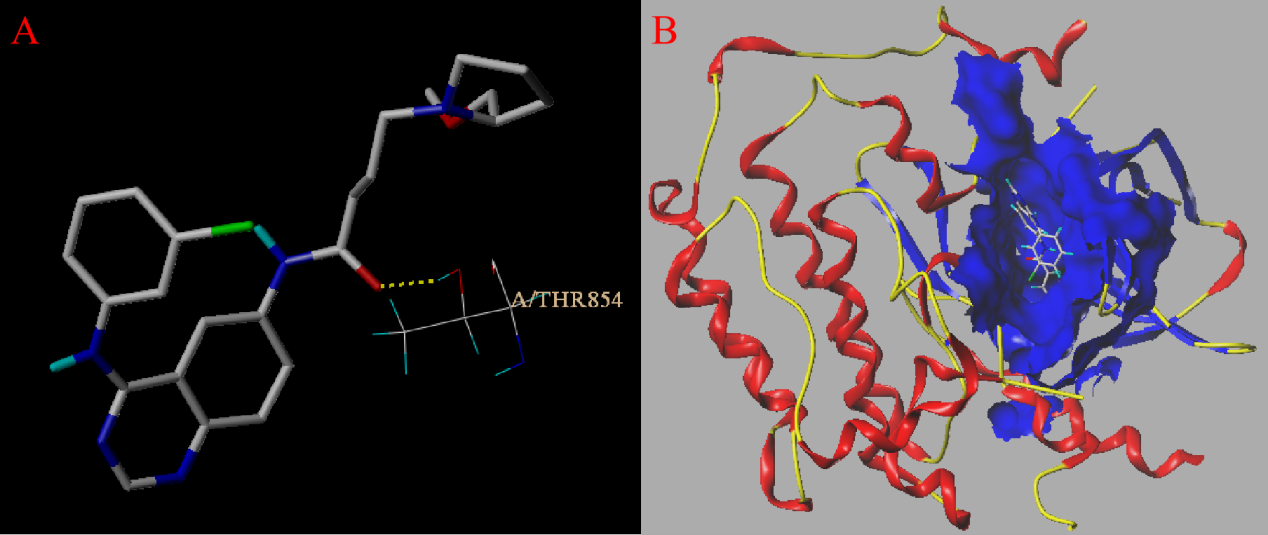


Fig.S9 Active site map (A) and active pocket coverage map (B) of compound 16P docking 3POZ


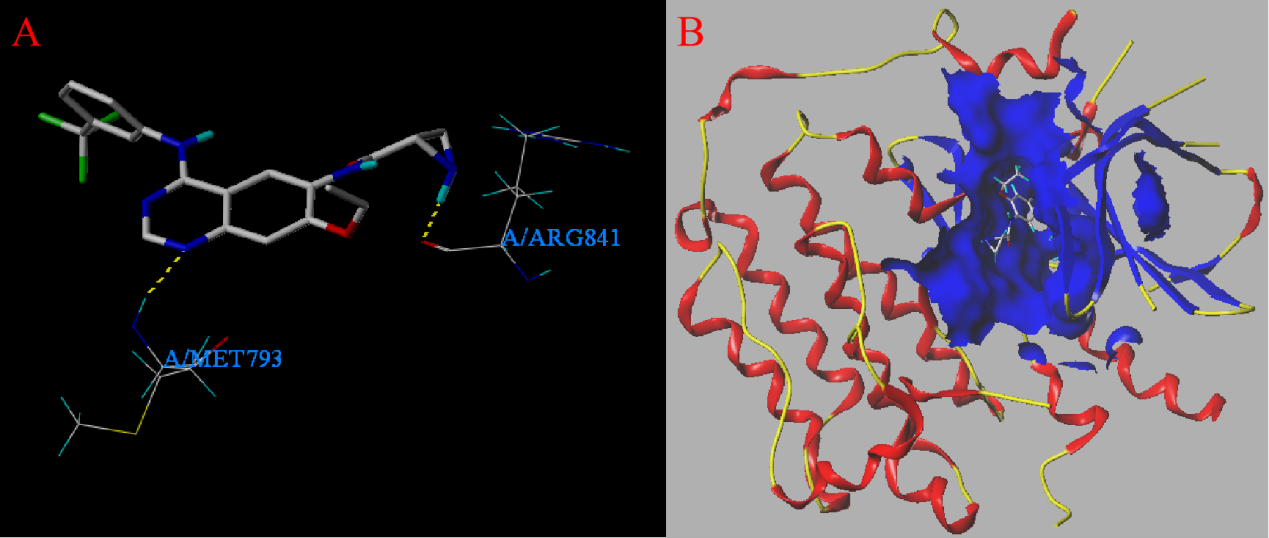


Fig.S10 Active site map (A) and active pocket coverage map (B) of compound TKI-2 docking 3POZ


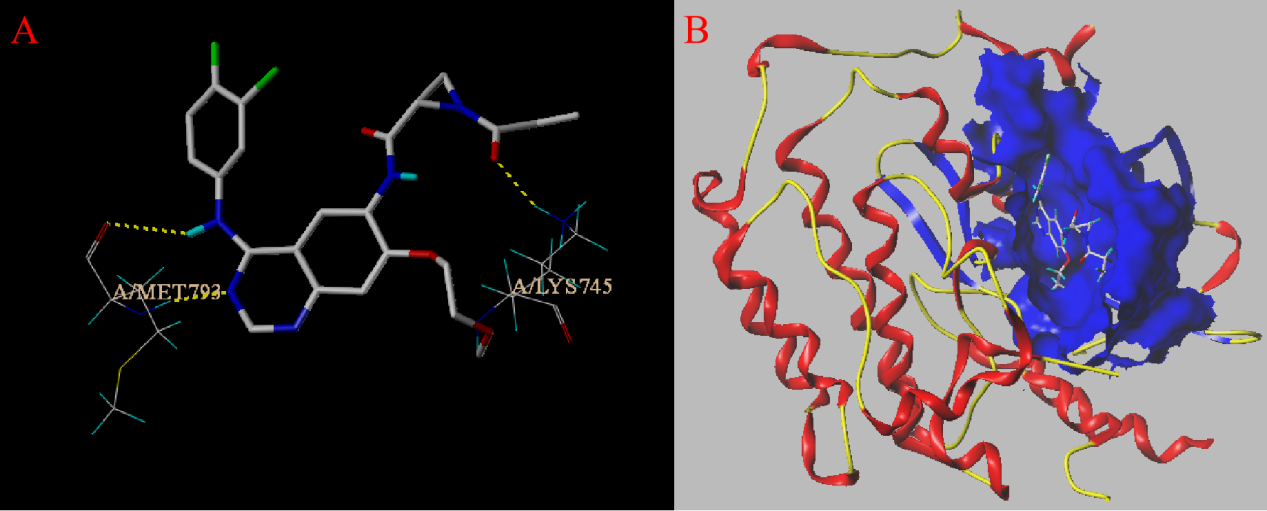


Fig.S11 Active site map (A) and active pocket coverage map (B) of compound TKI-23 docking 3POZ


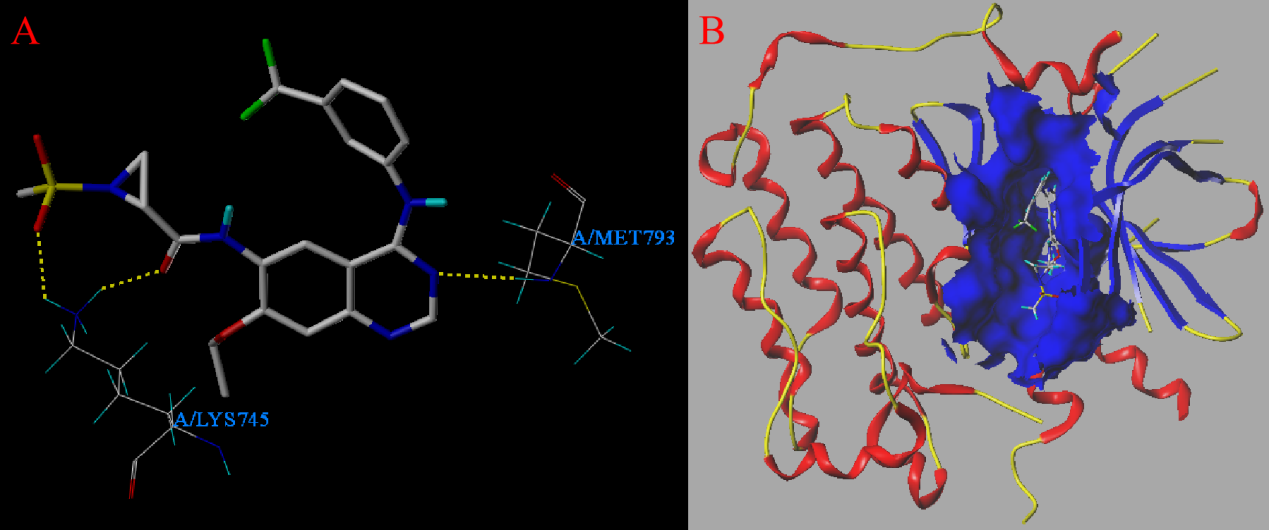


Fig.S12 Active site map (A) and active pocket coverage map (B) of compound TKI-57 docking 3POZ


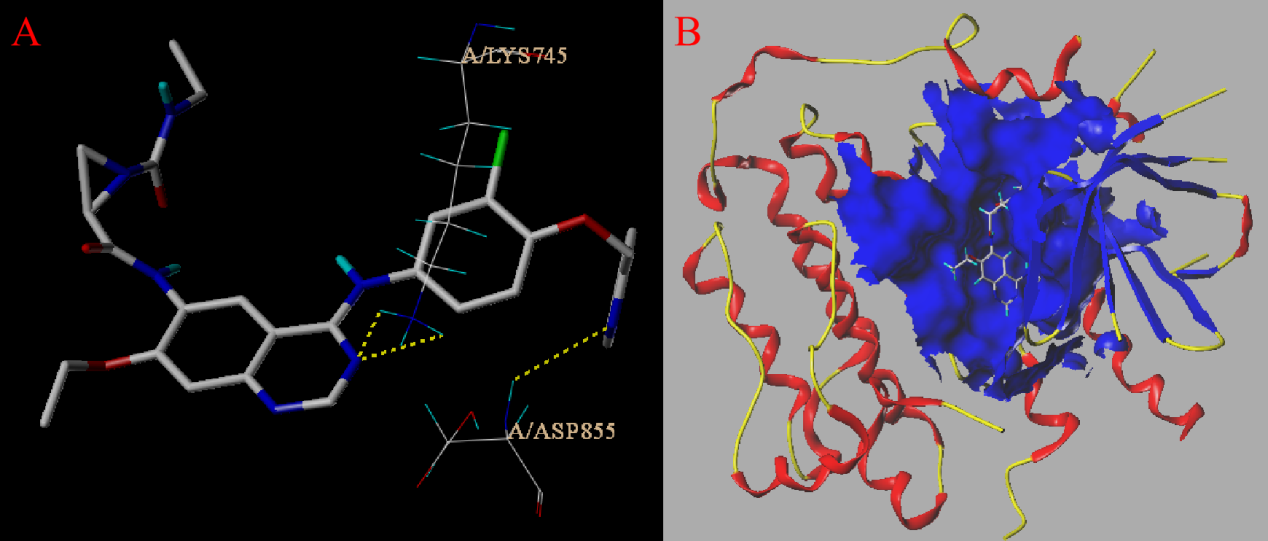


Fig.S13 Active site map (A) and active pocket coverage map (B) of compound TKI-66 docking 3POZ


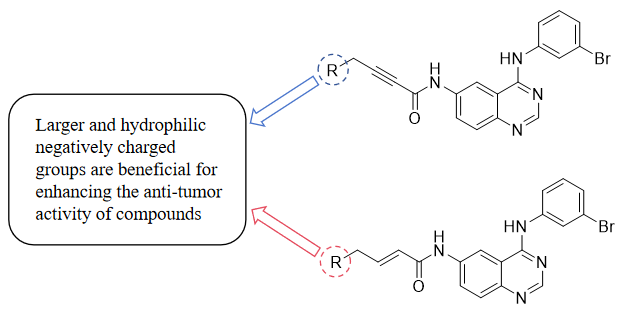


Fig.S14 Analysis of structure-activity relationship of quinazolines compounds


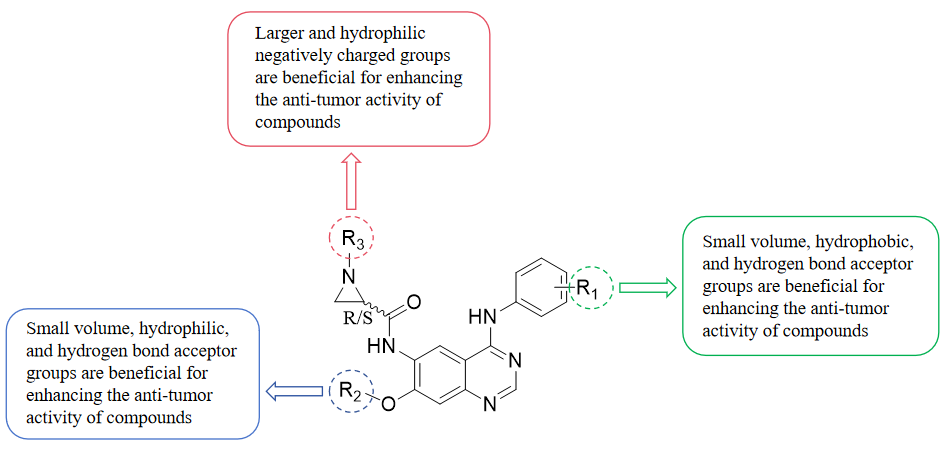


Fig.S15 Structure Activity Relationship Analysis of TKI Series Quinazoline Compounds

Table S1 pIC50 and COMFA model prediction results

| NO | name | pIC50 | Pred 1 | Res | NO | name | pIC50 | Pred 1 | Res |
| --- | --- | --- | --- | --- | --- | --- | --- | --- | --- |
| 01 | 10a | 7.328 | 7.201 | 0.127 | 31 | TKI-8 | 4.740 | 4.699 | 0.041 |
| 02 | 10b | 6.955 | 7.099 | -0.144 | 32 | TKI-11 | 5.279 | 5.312 | -0.033 |
| 03* | 10c | 7.377 | 7.02 | 0.357 | 33* | TKI-14 | 5.390 | 5.384 | 0.006 |
| 04* | 10d | 7.114 | 7.023 | 0.091 | 34 | TKI-19 | 5.775 | 5.752 | 0.023 |
| 05 | 10e | 7.027 | 7.033 | -0.006 | 35 | TKI-20 | 5.824 | 5.874 | -0.050 |
| 06 | 10f | 7.481 | 7.511 | -0.030 | 36 | TKI-22 | 5.606 | 5.609 | -0.003 |
| 07 | 10g | 7.495 | 7.349 | 0.146 | 37 | TKI-23 | 4.997 | 4.974 | 0.023 |
| 08* | 10h | 6.824 | 7.152 | -0.328 | 38 | TKI-28 | 5.344 | 5.323 | 0.021 |
| 09 | 10i | 7.081 | 7.163 | -0.082 | 39 | TKI-30 | 5.260 | 5.498 | -0.238 |
| 10 | 10j | 7.092 | 7.108 | -0.016 | 40 | TKI-33 | 5.535 | 5.65 | -0.115 |
| 11* | 10k | 6.223 | 6.789 | -0.566 | 41 | TKI-34 | 5.851 | 5.845 | 0.006 |
| 12 | 10l | 6.572 | 6.629 | -0.057 | 42* | TKI-35 | 5.883 | 4.758 | 1.125 |
| 13* | 10m | 7.114 | 6.770 | 0.344 | 43 | TKI-36 | 5.821 | 5.65 | 0.171 |
| 14 | 10n | 6.514 | 6.456 | 0.058 | 44 | TKI-38 | 5.344 | 5.362 | -0.018 |
| 15 | 10o | 6.502 | 6.502 | 0.000 | 45 | TKI-40 | 5.712 | 5.498 | 0.214 |
| 16 | 16a | 7.027 | 6.993 | 0.034 | 46* | TKI-44 | 5.606 | 5.828 | -0.222 |
| 17* | 16b | 6.712 | 6.597 | 0.115 | 47 | TKI-45 | 5.295 | 5.296 | -0.001 |
| 18 | 16c | 6.839 | 6.871 | -0.032 | 48* | TKI-46 | 4.516 | 5.830 | -1.314 |
| 19 | 16g | 6.740 | 6.695 | 0.045 | 49 | TKI-47 | 4.534 | 4.594 | -0.060 |
| 20 | 16i | 6.230 | 6.285 | -0.055 | 50 | TKI-49 | 5.385 | 5.249 | 0.136 |
| 21* | 16j | 6.654 | 6.377 | 0.277 | 51 | TKI-50 | 5.126 | 5.248 | -0.122 |
| 22 | 16p | 6.210 | 6.228 | -0.018 | 52 | TKI-52 | 5.082 | 5.109 | -0.027 |
| 23 | 16q | 6.249 | 6.209 | 0.040 | 53* | TKI-56 | 5.361 | 5.264 | 0.097 |
| 24* | 16r | 6.483 | 6.351 | 0.132 | 54 | TKI-57 | 5.261 | 5.251 | 0.010 |
| 25 | 16s | 6.121 | 6.136 | -0.015 | 55 | TKI-59 | 5.203 | 5.157 | 0.046 |
| 26 | TKI-1 | 5.770 | 5.959 | -0.189 | 56 | TKI-61 | 5.091 | 5.074 | 0.017 |
| 27 | TKI-2 | 4.992 | 5.012 | -0.020 | 57 | TKI-62 | 4.646 | 4.635 | 0.011 |

Table S1(continued)

| NO | name | pIC50 | Pred 1 | Res | NO | name | pIC50 | Pred 1 | Res |
| --- | --- | --- | --- | --- | --- | --- | --- | --- | --- |
| 28* | TKI-4 | 5.133 | 4.344 | 0.789 | 58 | TKI-64 | 5.176 | 5.192 | -0.016 |
| 29 | TKI-5 | 4.879 | 4.808 | 0.071 | 59* | TKI-65 | 5.347 | 5.327 | 0.020 |
| 30 | TKI-7 | 6.456 | 6.347 | 0.109 | 60 | TKI-66 | 4.766 | 4.771 | -0.005 |

*Compounds in the test set;pIC50:experimental value;Pred 1:predicted value;Res=pIC50-Pred 1.

Table S2 pIC50 and COMISA model prediction results

| NO | name | pIC50 | Pred 2 | Res | NO | name | pIC50 | Pred 2 | Res |
| --- | --- | --- | --- | --- | --- | --- | --- | --- | --- |
| 01 | 10a | 7.328 | 7.143 | 0.185 | 31 | TKI-8 | 4.740 | 4.709 | 0.031 |
| 02 | 10b | 6.955 | 7.067 | -0.112 | 32 | TKI-11 | 5.279 | 5.35 | -0.071 |
| 03* | 10c | 7.377 | 7.268 | 0.109 | 33* | TKI-14 | 5.390 | 5.121 | 0.269 |
| 04* | 10d | 7.114 | 6.957 | 0.157 | 34 | TKI-19 | 5.775 | 5.792 | -0.017 |
| 05 | 10e | 7.027 | 7.02 | 0.007 | 35 | TKI-20 | 5.824 | 5.884 | -0.060 |
| 06 | 10f | 7.481 | 7.521 | -0.040 | 36 | TKI-22 | 5.606 | 5.622 | -0.016 |
| 07 | 10g | 7.495 | 7.389 | 0.106 | 37 | TKI-23 | 4.997 | 4.99 | 0.007 |
| 08* | 10h | 6.824 | 6.957 | -0.133 | 38 | TKI-28 | 5.344 | 5.348 | -0.004 |
| 09 | 10i | 7.081 | 7.183 | -0.102 | 39 | TKI-30 | 5.260 | 5.503 | -0.243 |
| 10 | 10j | 7.092 | 7.119 | -0.027 | 40 | TKI-33 | 5.535 | 5.659 | -0.124 |
| 11* | 10k | 6.223 | 6.866 | -0.643 | 41 | TKI-34 | 5.851 | 5.796 | 0.055 |
| 12 | 10l | 6.572 | 6.554 | 0.018 | 42* | TKI-35 | 5.883 | 4.913 | 0.970 |
| 13* | 10m | 7.114 | 6.502 | 0.612 | 43 | TKI-36 | 5.821 | 5.66 | 0.161 |
| 14 | 10n | 6.514 | 6.468 | 0.046 | 44 | TKI-38 | 5.344 | 5.31 | 0.034 |
| 15 | 10o | 6.502 | 6.497 | 0.005 | 45 | TKI-40 | 5.712 | 5.501 | 0.211 |
| 16 | 16a | 7.027 | 6.989 | 0.038 | 46* | TKI-44 | 5.606 | 5.778 | -0.172 |
| 17* | 16b | 6.712 | 6.800 | -0.088 | 47 | TKI-45 | 5.295 | 5.296 | -0.001 |
| 18 | 16c | 6.839 | 6.896 | -0.057 | 48* | TKI-46 | 4.516 | 5.767 | -1.251 |
| 19 | 16g | 6.740 | 6.743 | -0.003 | 49 | TKI-47 | 4.534 | 4.546 | -0.012 |
| 20 | 16i | 6.230 | 6.235 | -0.005 | 50 | TKI-49 | 5.385 | 5.248 | 0.137 |
| 21* | 16j | 6.654 | 6.064 | 0.590 | 51 | TKI-50 | 5.126 | 5.241 | -0.115 |
| 22 | 16p | 6.210 | 6.211 | -0.001 | 52 | TKI-52 | 5.082 | 5.078 | 0.004 |
| 23 | 16q | 6.249 | 6.288 | -0.039 | 53* | TKI-56 | 5.361 | 5.193 | 0.168 |
| 24* | 16r | 6.483 | 6.331 | 0.152 | 54 | TKI-57 | 5.261 | 5.248 | 0.013 |
| 25 | 16s | 6.121 | 6.12 | 0.001 | 55 | TKI-59 | 5.203 | 5.196 | 0.007 |
| 26 | TKI-1 | 5.770 | 5.869 | -0.099 | 56 | TKI-61 | 5.091 | 5.09 | 0.001 |
| 27 | TKI-2 | 4.992 | 4.995 | -0.003 | 57 | TKI-62 | 4.646 | 4.699 | -0.053 |

Table S2(continued)

| NO | name | pIC50 | Pred 2 | Res | NO | name | pIC50 | Pred 2 | Res |
| --- | --- | --- | --- | --- | --- | --- | --- | --- | --- |
| 28* | TKI-4 | 5.133 | 4.16 | 0.973 | 58 | TKI-64 | 5.176 | 5.137 | 0.039 |
| 29 | TKI-5 | 4.879 | 4.863 | 0.016 | 59* | TKI-65 | 5.347 | 5.176 | 0.171 |
| 30 | TKI-7 | 6.456 | 6.42 | 0.036 | 60 | TKI-66 | 4.766 | 4.755 | 0.011 |

*Compounds in the test set;pIC50:experimental value;Pred 2:predicted value;Res=pIC50-Pred 2.

Table S3 Scoring results for the molecular docking of all the compounds

| Name | Total-score | CSCORE | Name | Total-score | CSCORE |
| --- | --- | --- | --- | --- | --- |
| 10a | 4.66 | 4 | TKI-8 | 7.73 | 5 |
| 10b | 5.47 | 5 | TKI-11 | 6.19 | 5 |
| 10c | 8.46 | 4 | TKI-14 | 7.54 | 5 |
| 10d | 7.68 | 5 | TKI-19 | 4.72 | 5 |
| 10e | 6.88 | 5 | TKI-20 | 6.03 | 4 |
| 10f | 7.37 | 4 | TKI-22 | 7.42 | 3 |
| 10g | 6.85 | 5 | TKI-23 | 8.56 | 5 |
| 10h | 8.29 | 4 | TKI-28 | 6.24 | 3 |
| 10i | 5.97 | 5 | TKI-30 | 5.08 | 5 |
| 10j | 8.13 | 4 | TKI-33 | 5.04 | 4 |
| 10k | 7.48 | 4 | TKI-34 | 5.41 | 4 |
| 10l | 7.82 | 5 | TKI-35 | 3.56 | 2 |
| 10m | 6.27 | 5 | TKI-36 | 4.49 | 5 |
| 10n | 8.27 | 5 | TKI-38 | 6.66 | 5 |
| 10o | 6.15 | 3 | TKI-40 | 2.80 | 3 |
| 16a | 5.63 | 5 | TKI-44 | 5.65 | 5 |
| 16b | 6.76 | 5 | TKI-45 | 4.89 | 5 |
| 16c | 6.17 | 4 | TKI-46 | 5.98 | 5 |
| 16g | 7.77 | 4 | TKI-47 | 6.51 | 3 |
| 16i | 5.69 | 5 | TKI-49 | 7.45 | 5 |
| 16j | 6.00 | 5 | TKI-50 | 8.75 | 4 |
| 16p | 7.39 | 4 | TKI-52 | 6.05 | 5 |
| 16q | 6.17 | 4 | TKI-56 | 5.56 | 5 |
| 16r | 6.46 | 5 | TKI-57 | 6.20 | 5 |
| 16s | 6.85 | 4 | TKI-59 | 4.30 | 5 |
| TKI-1 | 4.56 | 4 | TKI-61 | 6.52 | 4 |
| TKI-2 | 9.10 | 4 | TKI-62 | 5.10 | 3 |

Table S3(continued)

| Name | Total-score | CSCORE | Name | Total-score | CSCORE |
| --- | --- | --- | --- | --- | --- |
| TKI-4 | 6.16 | 5 | TKI-64 | 4.55 | 4 |
| TKI-5 | 6.13 | 4 | TKI-65 | 3.27 | 5 |
| TKI-7 | 4.32 | 3 | TKI-66 | 6.95 | 5 |

Table S4 Physicochemical and drug-likeness properties prediction of compounds using swissAdme

| Name | MW  (g/mol) | HBA | HBD | NRB | TBSA  (A2) | LogP | Xlogp | LogS  (ESOL) | Lipinski’s  rule violations | Ghose’s  rule violations | Veber’s rule | Egan’s rule | Muegge’s rule |
| --- | --- | --- | --- | --- | --- | --- | --- | --- | --- | --- | --- | --- | --- |
| 10a | 424.29 | 4 | 2 | 5 | 70.15 | 3.28 | 3.75 | -4.94 | 0 | 0 | 0 | 0 | 0 |
| 10b | 452.35 | 4 | 2 | 7 | 70.15 | 3.86 | 4.48 | -5.41 | 0 | 0 | 0 | 0 | 0 |
| 10c | 480.40 | 4 | 2 | 9 | 70.15 | 4.61 | 5.53 | -6.09 | 0 | 2 | 0 | 0 | 1 |
| 10d | 452.35 | 4 | 2 | 6 | 70.15 | 3.91 | 4.55 | -5.52 | 0 | 0 | 0 | 0 | 0 |
| 10e | 480.40 | 4 | 2 | 7 | 70.15 | 4.47 | 5.35 | -6.11 | 0 | 2 | 0 | 0 | 1 |
| 10f | 450.33 | 4 | 2 | 7 | 70.15 | 3.85 | 4.39 | -5.34 | 0 | 0 | 0 | 0 | 0 |
| 10g | 464.36 | 4 | 2 | 5 | 70.15 | 3.95 | 4.59 | -5.68 | 0 | 0 | 0 | 0 | 0 |
| 10h | 466.33 | 5 | 2 | 5 | 79.38 | 3.09 | 3.37 | -4.92 | 0 | 0 | 0 | 0 | 0 |
| 10i | 482.40 | 4 | 2 | 5 | 95.45 | 3.65 | 4.17 | -5.52 | 0 | 2 | 0 | 0 | 0 |
| 10j | 494.38 | 5 | 2 | 7 | 79.38 | 3.69 | 4.15 | -5.43 | 0 | 2 | 0 | 0 | 0 |
| 10k | 493.40 | 5 | 2 | 6 | 73.39 | 3.39 | 3.92 | -5.34 | 0 | 2 | 0 | 0 | 0 |
| 10l | 411.25 | 4 | 2 | 5 | 76.14 | 3.25 | 3.56 | -4.76 | 0 | 0 | 0 | 0 | 0 |
| 10m | 455.30 | 5 | 2 | 8 | 85.37 | 3.27 | 3.41 | -4.69 | 0 | 0 | 0 | 0 | 0 |
| 10n | 441.28 | 5 | 2 | 7 | 85.37 | 3.19 | 3.51 | -4.75 | 0 | 0 | 0 | 0 | 0 |

Table S4(continued)

| Name | MW  (g/mol) | HBA | HBD | NRB | TBSA  (A2) | LogP | Xlogp | LogS  (ESOL) | Lipinski’s  rule violations | Ghose’s  rule violations | Veber’s rule | Egan’s rule | Muegge’s rule |
| --- | --- | --- | --- | --- | --- | --- | --- | --- | --- | --- | --- | --- | --- |
| 10o | 397.23 | 4 | 3 | 4 | 87.14 | 2.70 | 3.02 | -4.41 | 0 | 0 | 0 | 0 | 0 |
| 16a | 426.31 | 4 | 2 | 7 | 70.15 | 3.41 | 3.58 | -4.72 | 0 | 0 | 0 | 0 | 0 |
| 16b | 452.36 | 4 | 2 | 9 | 70.15 | 4.01 | 4.31 | -5.19 | 0 | 0 | 0 | 0 | 0 |
| 16c | 482.42 | 4 | 2 | 11 | 70.15 | 4.76 | 5.37 | -5.87 | 0 | 2 | 1 | 0 | 1 |
| 16g | 466.37 | 4 | 2 | 7 | 70.15 | 4.07 | 4.42 | -5.45 | 0 | 0 | 0 | 0 | 0 |
| 16i | 484.41 | 4 | 2 | 7 | 95.45 | 3.76 | 4.00 | -5.30 | 0 | 2 | 0 | 0 | 0 |
| 16j | 496.40 | 5 | 2 | 9 | 79.38 | 3.81 | 3.98 | -5.20 | 0 | 2 | 0 | 0 | 0 |
| 16p | 496.40 | 5 | 2 | 9 | 79.38 | 3.84 | 3.98 | -5.20 | 0 | 2 | 0 | 0 | 0 |
| 16q | 470.36 | 5 | 2 | 10 | 79.38 | 3.39 | 3.43 | -4.65 | 0 | 0 | 0 | 0 | 0 |
| 16r | 456.34 | 5 | 3 | 9 | 90.38 | 2.98 | 2.89 | -4.30 | 0 | 0 | 0 | 0 | 0 |
| 16s | 549.51 | 5 | 2 | 8 | 73.39 | 4.42 | 5.01 | -6.20 | 1 | 2 | 0 | 0 | 1 |
| TKI-1 | 387.80 | 6 | 3 | 6 | 98.08 | 2.87 | 2.70 | -3.99 | 0 | 0 | 0 | 0 | 0 |
| TKI-2 | 417.38 | 8 | 3 | 8 | 98.08 | 3.36 | 3.22 | -4.32 | 0 | 0 | 0 | 0 | 0 |
| TKI-4 | 490.94 | 7 | 3 | 10 | 120.20 | 3.41 | 3.40 | -4.83 | 0 | 2 | 0 | 0 | 0 |

Table S4(continued)

| Name | MW  (g/mol) | HBA | HBD | NRB | TBSA  (A2) | LogP | Xlogp | LogS  (ESOL) | Lipinski’s  rule violations | Ghose’s  rule violations | Veber’s rule | Egan’s rule | Muegge’s rule |
| --- | --- | --- | --- | --- | --- | --- | --- | --- | --- | --- | --- | --- | --- |
| TKI-5 | 507.94 | 7 | 3 | 10 | 107.31 | 4.41 | 4.53 | -5.64 | 1 | 2 | 0 | 0 | 0 |
| TKI-7 | 387.80 | 6 | 3 | 6 | 98.08 | 2.87 | 2.70 | -3.99 | 0 | 0 | 0 | 0 | 0 |
| TKI-8 | 490.94 | 7 | 3 | 10 | 120.20 | 3.41 | 3.40 | -4.83 | 0 | 2 | 0 | 0 | 0 |
| TKI-11 | 417.38 | 8 | 3 | 8 | 98.08 | 3.36 | 3.22 | -4.32 | 0 | 0 | 0 | 0 | 0 |
| TKI-14 | 507.94 | 7 | 3 | 10 | 107.31 | 4.41 | 4.53 | -5.64 | 1 | 2 | 0 | 0 | 0 |
| TKI-19 | 429.83 | 6 | 2 | 7 | 96.22 | 2.78 | 2.63 | -4.09 | 0 | 0 | 0 | 0 | 0 |
| TKI-20 | 441.84 | 6 | 2 | 8 | 96.22 | 3.08 | 3.22 | -4.46 | 0 | 0 | 0 | 0 | 0 |
| TKI-22 | 499.92 | 7 | 2 | 9 | 105.45 | 3.23 | 3.15 | -4.67 | 0 | 2 | 0 | 0 | 0 |
| TKI-23 | 487.91 | 7 | 2 | 11 | 105.45 | 3.21 | 2.95 | -4.35 | 0 | 1 | 1 | 0 | 0 |
| TKI-28 | 471.43 | 8 | 2 | 10 | 96.22 | 3.58 | 3.74 | -4.81 | 0 | 0 | 0 | 0 | 0 |
| TKI-30 | 544.99 | 7 | 2 | 11 | 118.34 | 3.64 | 3.92 | -5.31 | 1 | 2 | 1 | 0 | 0 |
| TKI-33 | 443.86 | 6 | 2 | 8 | 96.22 | 3.10 | 3.10 | -4.40 | 0 | 0 | 0 | 0 | 0 |
| TKI-34 | 429.83 | 6 | 2 | 7 | 96.22 | 2.78 | 2.63 | -4.09 | 0 | 0 | 0 | 0 | 0 |
| TKI-35 | 441.84 | 6 | 2 | 8 | 96.22 | 3.14 | 3.22 | -4.46 | 0 | 0 | 0 | 0 | 0 |
| TKI-36 | 443.86 | 6 | 2 | 8 | 96.22 | 3.10 | 3.10 | -4.40 | 0 | 0 | 0 | 0 | 0 |

Table S4(continued)

| Name | MW  (g/mol) | HBA | HBD | NRB | TBSA  (A2) | LogP | Xlogp | LogS  (ESOL) | Lipinski’s  rule violations | Ghose’s  rule violations | Veber’s rule | Egan’s rule | Muegge’s rule |
| --- | --- | --- | --- | --- | --- | --- | --- | --- | --- | --- | --- | --- | --- |
| TKI-38 | 471.43 | 8 | 2 | 10 | 96.22 | 3.58 | 3.74 | -4.81 | 0 | 0 | 0 | 0 | 0 |
| TKI-40 | 544.99 | 7 | 2 | 12 | 118.34 | 3.63 | 3.92 | -5.31 | 1 | 2 | 1 | 0 | 0 |
| TKI-44 | 499.92 | 7 | 2 | 9 | 105.45 | 3.28 | 3.15 | -4.67 | 0 | 2 | 0 | 0 | 0 |
| TKI-45 | 487.91 | 7 | 2 | 11 | 105.45 | 3.21 | 2.95 | -4.35 | 0 | 1 | 1 | 0 | 0 |
| TKI-46 | 407.42 | 6 | 2 | 8 | 105.45 | 1.98 | 1.87 | -3.41 | 0 | 0 | 0 | 0 | 0 |
| TKI-47 | 407.42 | 6 | 2 | 8 | 105.45 | 2.00 | 1.87 | -3.41 | 0 | 0 | 0 | 0 | 0 |
| TKI-49 | 539.56 | 7 | 2 | 10 | 114.04 | 3.55 | 3.61 | -5.26 | 1 | 2 | 0 | 0 | 0 |
| TKI-50 | 539.56 | 7 | 2 | 10 | 114.04 | 3.59 | 3.61 | -5.26 | 1 | 2 | 0 | 0 | 0 |
| TKI-52 | 465.89 | 8 | 2 | 7 | 121.67 | 2.41 | 2.42 | -4.17 | 0 | 0 | 0 | 0 | 0 |
| TKI-56 | 495.47 | 10 | 2 | 9 | 121.67 | 2.86 | 2.94 | -4.52 | 0 | 1 | 0 | 0 | 0 |
| TKI-57 | 495.47 | 10 | 2 | 9 | 121.67 | 2.86 | 2.94 | -4.52 | 0 | 1 | 0 | 0 | 0 |
| TKI-59 | 465.89 | 8 | 2 | 7 | 121.67 | 2.36 | 2.42 | -4.17 | 0 | 0 | 0 | 0 | 0 |
| TKI-61 | 458.87 | 6 | 3 | 9 | 108.25 | 2.93 | 2.82 | -4.24 | 0 | 0 | 0 | 0 | 0 |
| TKI-62 | 506.92 | 6 | 3 | 9 | 108.25 | 3.61 | 4.01 | -5.37 | 1 | 2 | 0 | 0 | 0 |
| TKI-64 | 486.93 | 6 | 3 | 9 | 107.25 | 3.42 | 3.44 | -4.78 | 0 | 2 | 0 | 0 | 0 |

Table S4(continued)

| Name | MW  (g/mol) | HBA | HBD | NRB | TBSA  (A2) | LogP | Xlogp | LogS  (ESOL) | Lipinski’s  rule violations | Ghose’s  rule violations | Veber’s rule | Egan’s rule | Muegge’s rule |
| --- | --- | --- | --- | --- | --- | --- | --- | --- | --- | --- | --- | --- | --- |
| TKI-65 | 458.87 | 6 | 3 | 9 | 108.25 | 2.93 | 2.82 | -4.24 | 0 | 0 | 0 | 0 | 0 |
| TKI-66 | 562.02 | 7 | 3 | 13 | 130.37 | 3.40 | 3.52 | -5.09 | 2 | 2 | 1 | 0 | 0 |

LogP: The consensus value of iLogP, XLogP3, WLogP, MLogP and LogP (SILICOS-IT)

LogS scale: Insoluble < − 10 < Poorly soluble < − 6 < Moderately soluble < − 4 < Soluble < − 2 < Very soluble < 0 < Highly soluble

Muegge’s rule: 200 ≤ MW ≤ 600, − 2 ≤ XLogP ≤ 5, TPSA ≤ 150; # of rings ≤ 7, # of carbons > 4, # of heteroatoms > 1, NRB ≤ 15, HBA ≤ 10 and HBA ≤ 5

Ghose’s rule: 160 ≤ MW ≤ 480, − 0.4 ≤ WLogP ≤ 5.6, 40 ≤ Molar Refractivity (MR) ≤ 130 and 20 ≤ Atoms ≤ 70

Veber’s rule: NRB ≤ 10 and TPSA ≤ 140

Egan’s rule: WLogP ≤ 5.88 and TPSA ≤ 131.6

Table S5The pharmacokinetics and toxicity of 10 series compounds were predicted using PKCSM

| Name | | 10a | 10b | 10c | 10d | 10e | 10f | 10g | 10h | 10i | 10j | 10k | 10l | 10m | 10n | 10o |
| --- | --- | --- | --- | --- | --- | --- | --- | --- | --- | --- | --- | --- | --- | --- | --- | --- |
| Absorption | CaCo-2 Permeability(Log unit) | -4.6 | -4.76 | -4.73 | -4.79 | -4.86 | -4.79 | -4.81 | -4.62 | -4.99 | -4.84 | -4.94 | -4.52 | -4.6 | -4.59 | -4.75 |
| HIA | 0.936 | 0.934 | 0.918 | 0.921 | 0.881 | 0.913 | 0.969 | 0.947 | 0.949 | 0.942 | 0.882 | 0.96 | 0.921 | 0.935 | 0.975 |
| Distribution | BBB Penetration | 0.837 | 0.301 | 0.76 | 0.9 | 0.938 | 0.99 | 0.984 | 0.98 | 0.967 | 0.796 | 0.957 | 0.901 | 0.781 | 0.869 | 0.799 |
| PPB(%) | 91.65 | 96.58 | 94.62 | 93.56 | 91.71 | 91.31 | 99.08 | 98.58 | 94.99 | 95.98 | 99.06 | 98.3 | 94.47 | 93.87 | 94.59 |
| Metaboliam | CYP1A2 inhibitor | 0.984 | 0.997 | 0.997 | 0.996 | 0.995 | 0.997 | 0.975 | 0.969 | 0.991 | 0.934 | 0.918 | 0.998 | 0.992 | 0.991 | 0.999 |
| CYP1A2 substrate | 0.294 | 0.264 | 0.241 | 0.254 | 0.21 | 0.247 | 0.244 | 0.234 | 0.263 | 0.272 | 0.382 | 0.259 | 0.254 | 0.224 | 0.158 |
| CYP2C19 inhibitor | 0.682 | 0.895 | 0.928 | 0.854 | 0.774 | 0.795 | 0.889 | 0.689 | 0.868 | 0.786 | 0.297 | 0.87 | 0.776 | 0.812 | 0.895 |
| CYP2C19 substrate | 0.602 | 0.579 | 0.58 | 0.596 | 0.585 | 0.611 | 0.538 | 0.538 | 0.612 | 0.558 | 0.614 | 0.547 | 0.497 | 0.507 | 0.52 |
| CYP2C9 inhibitor | 0.036 | 0.296 | 0.098 | 0.398 | 0.114 | 0.351 | 0.036 | 0.232 | 0.374 | 0.39 | 0.085 | 0.577 | 0.675 | 0.435 | 0.42 |
| CYP2C9 substrate | 0.292 | 0.225 | 0.116 | 0.252 | 0.182 | 0.32 | 0.013 | 0.001 | 0.384 | 0.128 | 0.078 | 0.711 | 0.286 | 0.505 | 0.569 |
| CYP2D6 inhibitor | 0.229 | 0.035 | 0.756 | 0.558 | 0.365 | 0.968 | 0.791 | 0.072 | 0.539 | 0.468 | 0.009 | 0.074 | 0.041 | 0.065 | 0.116 |
| CYP2D6 substrate | 0.365 | 0.352 | 0.365 | 0.392 | 0.406 | 0.356 | 0.376 | 0.388 | 0.345 | 0.379 | 0.355 | 0.352 | 0.379 | 0.358 | 0.345 |
| CYP3A4 inhibitor | 0.582 | 0.623 | 0.704 | 0.542 | 0.543 | 0.867 | 0.697 | 0.836 | 0.809 | 0.879 | 0.788 | 0.899 | 0.898 | 0.916 | 0.848 |
| CYP3A4 substrate | 0.725 | 0.761 | 0.844 | 0.816 | 0.904 | 0.778 | 0.566 | 0.566 | 0.725 | 0.882 | 0.988 | 0.539 | 0.781 | 0.631 | 0.337 |

Table S5(continued)

| Name | | 10a | 10b | 10c | 10d | 10e | 10f | 10g | 10h | 10i | 10j | 10k | 10l | 10m | 10n | 10o |
| --- | --- | --- | --- | --- | --- | --- | --- | --- | --- | --- | --- | --- | --- | --- | --- | --- |
| Excretion | Clearance(ml/min/kg) | 7.03 | 5.93 | 5.91 | 7.62 | 8.14 | 7.21 | 5.77 | 5.72 | 7.52 | 7.54 | 6.35 | 6.49 | 7.03 | 6.83 | 5.41 |
| Half-life(h) | <3 | <3 | <3 | <3 | < 3 | < 3 | < 3 | < 3 | < 3 | < 3 | < 3 | < 3 | < 3 | < 3 | < 3 |
| Toxicity | AMES Toxicity | 0.009 | 0.105 | 0.025 | 0.046 | 0.102 | 0.003 | 0.003 | 0.015 | 0.011 | 0.008 | 0.025 | 0.203 | 0.186 | 0.305 | 0.038 |
| Carcinogenicity | 0.251 | 0.191 | 0.143 | 0.154 | 0.101 | 0.197 | 0.119 | 0.316 | 0.277 | 0.099 | 0.084 | 0.236 | 0.192 | 0.218 | 0.34 |
| hERG Blockers | 0.964 | 0.973 | 0.978 | 0.966 | 0.982 | 0.916 | 0.928 | 0.654 | 0.574 | 0.974 | 0.895 | 0.634 | 0.732 | 0.632 | 0.295 |

Table S6 The pharmacokinetics and toxicity of 16 series compounds were predicted using PkCSM

| Name | | 16a | 16b | 16c | 16g | 16i | 16j | 16p | 16q | 16r | 16s |
| --- | --- | --- | --- | --- | --- | --- | --- | --- | --- | --- | --- |
| Absorption | CaCo-2 Permeability(Log unit) | -4.62 | -4.81 | -4.78 | -4.87 | -5.08 | -4.91 | -4.86 | -4.93 | -5.21 | -5.46 |
| HIA | 0.929 | 0.935 | 0.935 | 0.977 | 0.959 | 0.954 | 0.952 | 0.9 | 0.893 | 0.942 |
| Distribution | BBB Penetration | 0.995 | 0.881 | 0.987 | 0.999 | 0.999 | 0.993 | 0.99 | 0.968 | 0.81 | 0.999 |
| PPB(%) | 82.93 | 90.66 | 89.27 | 95.04 | 90.66 | 92.56 | 92.47 | 81.8 | 83.01 | 96.12 |
| Metaboliam | CYP1A2 inhibitor | 0.932 | 0.935 | 0.982 | 0.909 | 0.959 | 0.694 | 0.692 | 0.929 | 0.97 | 0.144 |
| CYP1A2 substrate | 0.274 | 0.256 | 0.217 | 0.219 | 0.239 | 0.251 | 0.256 | 0.287 | 0.174 | 0.176 |
| CYP2C19 inhibitor | 0.763 | 0.856 | 0.972 | 0.957 | 0.99 | 0.981 | 0.959 | 0.97 | 0.869 | 0.822 |
| CYP2C19 substrate | 0.516 | 0.512 | 0.526 | 0.487 | 0.555 | 0.505 | 0.507 | 0.495 | 0.468 | 0.459 |
| CYP2C9 inhibitor | 0.182 | 0.277 | 0.265 | 0.134 | 0.751 | 0.719 | 0.678 | 0.131 | 0.728 | 0.019 |
| CYP2C9 substrate | 0.239 | 0.151 | 0.051 | 0.005 | 0.2 | 0.066 | 0.066 | 0.354 | 0.243 | 0 |
| CYP2D6 inhibitor | 0.911 | 0.054 | 0.848 | 0.932 | 0.783 | 0.805 | 0.652 | 0.9 | 0.292 | 0.991 |
| CYP2D6 substrate | 0.373 | 0.367 | 0.384 | 0.41 | 0.378 | 0.39 | 0.39 | 0.383 | 0.355 | 0.381 |
| CYP3A4 inhibitor | 0.457 | 0.453 | 0.552 | 0.465 | 0.626 | 0.756 | 0.748 | 0.664 | 0.615 | 0.178 |
| CYP3A4 substrate | 0.773 | 0.789 | 0.85 | 0.535 | 0.65 | 0.877 | 0.877 | 0.908 | 0.768 | 0.727 |

Table S6(continued)

| Name | | 16a | 16b | 16c | 16g | 16i | 16j | 16p | 16q | 16r | 16s |
| --- | --- | --- | --- | --- | --- | --- | --- | --- | --- | --- | --- |
| Excretion | Clearance(ml/min/kg) | 7.83 | 5.99 | 5.94 | 5.82 | 7.76 | 7.76 | 7.72 | 8.41 | 8.19 | 5.32 |
| Half-life(h) | < 3 | < 3 | < 3 | < 3 | < 3 | < 3 | < 3 | < 3 | < 3 | < 3 |
| Toxicity | AMES Toxicity | 0.001 | 0.029 | 0.006 | 0 | 0 | 0 | 0.004 | 0.002 | 0 | 0 |
| Carcinogenicity | 0.226 | 0.161 | 0.127 | 0.127 | 0.289 | 0.098 | 0.098 | 0.181 | 0.194 | 0.035 |
| hERG Blockers | 0.911 | 0.927 | 0.965 | 0.932 | 0.465 | 0.972 | 0.936 | 0.779 | 0.707 | 0.906 |

Table S7The pharmacokinetics and toxicity of TKI series compounds (TKI-1 to TKI-22) were predicted using PkCSM

| Name | | TKI-1 | TKI-2 | TKI-4 | TKI-5 | TKI-7 | TKI-8 | TKI-11 | TKI-14 | TKI-19 | TKI-20 | TKI-22 |
| --- | --- | --- | --- | --- | --- | --- | --- | --- | --- | --- | --- | --- |
| Absorption | CaCo-2 Permeability(Log unit) | -4.98 | -5.31 | -5.62 | -5.6 | -4.98 | -5.62 | -5.31 | -5.6 | -4.77 | -4.9 | -5.52 |
| HIA | 0.888 | 0.911 | 0.688 | 0.786 | 0.888 | 0.688 | 0.911 | 0.786 | 0.915 | 0.988 | 0.983 |
| Distribution | BBB Penetration | 0.112 | 0.326 | 0.001 | 0.003 | 0.112 | 0.001 | 0.326 | 0.003 | 0.006 | 0.053 | 0.004 |
| PPB(%) | 88.58 | 94.6 | 98.58 | 97.05 | 88.58 | 98.58 | 94.6 | 97.05 | 93.67 | 89.02 | 96.83 |
| Metaboliam | CYP1A2 inhibitor | 0.992 | 0.983 | 0.922 | 0.932 | 0.992 | 0.922 | 0.983 | 0.932 | 0.987 | 0.962 | 0.912 |
| CYP1A2 substrate | 0.226 | 0.343 | 0.104 | 0.113 | 0.226 | 0.104 | 0.343 | 0.113 | 0.204 | 0.17 | 0.152 |
| CYP2C19 inhibitor | 0.476 | 0.602 | 0.49 | 0.26 | 0.476 | 0.49 | 0.602 | 0.26 | 0.911 | 0.81 | 0.392 |
| CYP2C19 substrate | 0.426 | 0.372 | 0.36 | 0.341 | 0.426 | 0.36 | 0.372 | 0.341 | 0.377 | 0.497 | 0.449 |
| CYP2C9 inhibitor | 0 | 0 | 0 | 0.002 | 0 | 0 | 0 | 0.002 | 0 | 0 | 0 |
| CYP2C9 substrate | 0.961 | 0.93 | 0.546 | 0.926 | 0.961 | 0.546 | 0.93 | 0.926 | 0.939 | 0.455 | 0.067 |
| CYP2D6 inhibitor | 0.046 | 0.009 | 0.001 | 0.006 | 0.046 | 0.001 | 0.009 | 0.006 | 0.001 | 0.247 | 0.029 |
| CYP2D6 substrate | 0.065 | 0.069 | 0.09 | 0.083 | 0.065 | 0.09 | 0.069 | 0.083 | 0.054 | 0.056 | 0.051 |
| CYP3A4 inhibitor | 0.544 | 0.549 | 0.74 | 0.862 | 0.544 | 0.74 | 0.549 | 0.862 | 0.494 | 0.573 | 0.618 |
| CYP3A4 substrate | 0.952 | 0.921 | 0.977 | 0.986 | 0.952 | 0.977 | 0.921 | 0.986 | 0.96 | 0.996 | 0.999 |

Table S7(continued)

| Name | | TKI-1 | TKI-2 | TKI-4 | TKI-5 | TKI-7 | TKI-8 | TKI-11 | TKI-14 | TKI-19 | TKI-20 | TKI-22 |
| --- | --- | --- | --- | --- | --- | --- | --- | --- | --- | --- | --- | --- |
| Excretion | Clearance(ml/min/kg) | 6.69 | 8.65 | 6.91 | 6.47 | 6.69 | 6.91 | 8.65 | 6.47 | 6.13 | 7.29 | 7.3 |
| Half-life(h) | < 3 | < 3 | < 3 | < 3 | < 3 | < 3 | < 3 | < 3 | < 3 | < 3 | < 3 |
| Toxicity | AMES Toxicity | 1 | 1 | 0.999 | 0.998 | 1 | 0.999 | 1 | 0.998 | 1 | 1 | 1 |
| Carcinogenicity | 0.668 | 0.753 | 0.653 | 0.488 | 0.668 | 0.653 | 0.753 | 0.488 | 0.703 | 0.802 | 0.806 |
| hERG Blockers | 0.004 | 0.002 | 0.005 | 0.004 | 0.004 | 0.005 | 0.002 | 0.004 | 0 | 0 | 0.017 |

Table S8The pharmacokinetics and toxicity of TKI series compounds (TKI-23 to TKI-46) were predicted using PkCSM

| Name | | TKI-23 | TKI-28 | TKI-30 | TKI-33 | TKI-34 | TKI-35 | TKI-36 | TKI-38 | TKI-40 | TKI-44 | TKI-45 | TKI-46 |
| --- | --- | --- | --- | --- | --- | --- | --- | --- | --- | --- | --- | --- | --- |
| Absorption | CaCo-2 Permeability(Log unit) | -5.38 | -5.23 | -5.58 | -4.93 | -4.77 | -4.9 | -4.94 | -5.23 | -5.58 | -5.52 | -5.38 | -4.77 |
| HIA | 0.978 | 0.99 | 0.955 | 0.987 | 0.915 | 0.988 | 0.987 | 0.99 | 0.957 | 0.983 | 0.978 | 0.862 |
| Distribution | BBB Penetration | 0.007 | 0.173 | 0 | 0.016 | 0.006 | 0.053 | 0.007 | 0.173 | 0.001 | 0.004 | 0.007 | 0 |
| PPB(%) | 86.18 | 94.49 | 99.16 | 100.25 | 93.67 | 89.02 | 91.38 | 94.49 | 99.07 | 96.83 | 86.18 | 95.86 |
| Metaboliam | CYP1A2 inhibitor | 0.894 | 0.921 | 0.697 | 0.987 | 0.987 | 0.962 | 0.986 | 0.921 | 0.666 | 0.912 | 0.894 | 0.957 |
| CYP1A2 substrate | 0.182 | 0.305 | 0.075 | 0.197 | 0.204 | 0.17 | 0.197 | 0.305 | 0.073 | 0.152 | 0.182 | 0.259 |
| CYP2C19 inhibitor | 0.654 | 0.543 | 0.09 | 0.365 | 0.911 | 0.81 | 0.707 | 0.543 | 0.35 | 0.392 | 0.654 | 0.591 |
| CYP2C19 substrate | 0.473 | 0.491 | 0.422 | 0.49 | 0.377 | 0.497 | 0.491 | 0.491 | 0.421 | 0.449 | 0.473 | 0.399 |
| CYP2C9 inhibitor | 0 | 0 | 0.001 | 0 | 0 | 0 | 0 | 0 | 0.001 | 0 | 0 | 0 |
| CYP2C9 substrate | 0.147 | 0.124 | 0.034 | 0.431 | 0.939 | 0.455 | 0.421 | 0.124 | 0.033 | 0.067 | 0.147 | 0.709 |
| CYP2D6 inhibitor | 0.06 | 0.009 | 0.099 | 0.055 | 0.001 | 0.247 | 0.046 | 0.009 | 0.118 | 0.029 | 0.06 | 0.012 |
| CYP2D6 substrate | 0.057 | 0.066 | 0.076 | 0.057 | 0.054 | 0.056 | 0.057 | 0.066 | 0.076 | 0.051 | 0.057 | 0.07 |
| CYP3A4 inhibitor | 0.537 | 0.467 | 0.712 | 0.567 | 0.494 | 0.573 | 0.556 | 0.467 | 0.684 | 0.618 | 0.537 | 0.393 |
| CYP3A4 substrate | 0.999 | 0.986 | 0.998 | 0.998 | 0.96 | 0.996 | 0.998 | 0.986 | 0.998 | 0.999 | 0.999 | 0.991 |

Table S8(continued)

| Name | | TKI-23 | TKI-28 | TKI-30 | TKI-33 | TKI-34 | TKI-35 | TKI-36 | TKI-38 | TKI-40 | TKI-44 | TKI-45 | TKI-46 |
| --- | --- | --- | --- | --- | --- | --- | --- | --- | --- | --- | --- | --- | --- |
| Excretion | Clearance(ml/min/kg) | 7.57 | 8.66 | 6.87 | 7.19 | 6.13 | 7.29 | 7.23 | 8.66 | 6.89 | 7.3 | 7.57 | 5.38 |
| Half-life(h) | < 3 | < 3 | < 3 | < 3 | < 3 | < 3 | < 3 | < 3 | < 3 | < 3 | < 3 | < 3 |
| Toxicity | AMES Toxicity | 1 | 1 | 1 | 1 | 1 | 1 | 1 | 1 | 0.998 | 1 | 1 | 1 |
| Carcinogenicity | 0.827 | 0.844 | 0.749 | 0.799 | 0.703 | 0.802 | 0.802 | 0.844 | 0.752 | 0.806 | 0.827 | 0.647 |
| hERG Blockers | 0.001 | 0 | 0.004 | 0.003 | 0 | 0 | 0.001 | 0 | 0.03 | 0.017 | 0.001 | 0.008 |

Table S9The pharmacokinetics and toxicity of TKI series compounds (TKI-47 to TKI-66) were predicted using PkCSM

| Name | | TKI-47 | TKI-49 | TKI-50 | TKI-52 | TKI-56 | TKI-57 | TKI-59 | TKI-61 | TKI-62 | TKI-64 | TKI-65 | TKI-66 |
| --- | --- | --- | --- | --- | --- | --- | --- | --- | --- | --- | --- | --- | --- |
| Absorption | CaCo-2 Permeability(Log unit) | -4.77 | -5.65 | -5.65 | -4.97 | -5.57 | -5.57 | -4.97 | -5.53 | -5.2 | -5.1 | -5.52 | -5.66 |
| HIA | 0.852 | 0.876 | 0.881 | 0.967 | 0.97 | 0.971 | 0.965 | 0.975 | 0.705 | 0.703 | 0.972 | 0.902 |
| Distribution | BBB Penetration | 0 | 0 | 0 | 0.029 | 0.056 | 0.121 | 0.013 | 0.13 | 0.126 | 0.012 | 0.061 | 0 |
| PPB(%) | 83.88 | 99.33 | 100.95 | 94.97 | 90.29 | 96.23 | 85.99 | 102.06 | 108.18 | 109.15 | 93.54 | 96.64 |
| Metaboliam | CYP1A2 inhibitor | 0.951 | 0.878 | 0.89 | 0.991 | 0.971 | 0.986 | 0.981 | 0.935 | 0.997 | 0.971 | 0.921 | 0.491 |
| CYP1A2 substrate | 0.262 | 0.09 | 0.089 | 0.172 | 0.297 | 0.297 | 0.173 | 0.099 | 0.064 | 0.083 | 0.101 | 0.041 |
| CYP2C19 inhibitor | 0.603 | 0.586 | 0.527 | 0.512 | 0.904 | 0.825 | 0.645 | 0.909 | 0.513 | 0.972 | 0.919 | 0.441 |
| CYP2C19 substrate | 0.401 | 0.316 | 0.314 | 0.354 | 0.352 | 0.35 | 0.355 | 0.503 | 0.323 | 0.391 | 0.505 | 0.438 |
| CYP2C9 inhibitor | 0 | 0.003 | 0.004 | 0.001 | 0.001 | 0.001 | 0.001 | 0 | 0.002 | 0 | 0 | 0 |
| CYP2C9 substrate | 0.701 | 0.341 | 0.35 | 0.977 | 0.92 | 0.921 | 0.977 | 0.479 | 0.958 | 0.927 | 0.466 | 0.037 |
| CYP2D6 inhibitor | 0.007 | 0 | 0 | 0 | 0 | 0 | 0 | 0.007 | 0.077 | 0 | 0.004 | 0.001 |
| CYP2D6 substrate | 0.07 | 0.069 | 0.069 | 0.053 | 0.059 | 0.059 | 0.053 | 0.044 | 0.052 | 0.053 | 0.044 | 0.058 |
| CYP3A4 inhibitor | 0.405 | 0.849 | 0.843 | 0.723 | 0.667 | 0.667 | 0.725 | 0.544 | 0.733 | 0.796 | 0.568 | 0.731 |
| CYP3A4 substrate | 0.991 | 0.909 | 0.909 | 0.994 | 0.977 | 0.977 | 0.994 | 0.997 | 0.944 | 0.981 | 0.997 | 0.999 |

Table S9(continued)

| Name | | TKI-47 | TKI-49 | TKI-50 | TKI-52 | TKI-56 | TKI-57 | TKI-59 | TKI-61 | TKI-62 | TKI-64 | TKI-65 | TKI-66 |
| --- | --- | --- | --- | --- | --- | --- | --- | --- | --- | --- | --- | --- | --- |
| Excretion | Clearance(ml/min/kg) | 5.4 | 5.86 | 5.87 | 4.46 | 8.73 | 8.73 | 4.5 | 7.41 | 6.2 | 7.05 | 7.43 | 6.98 |
| Half-life(h) | < 3 | < 3 | < 3 | < 3 | < 3 | < 3 | < 3 | < 3 | < 3 | < 3 | < 3 | < 3 |
| Toxicity | AMES Toxicity | 1 | 0.998 | 0.999 | 1 | 1 | 1 | 1 | 1 | 1 | 1 | 1 | 0.999 |
| Carcinogenicity | 0.646 | 0.653 | 0.654 | 0.61 | 0.692 | 0.689 | 0.614 | 0.765 | 0.387 | 0.503 | 0.765 | 0.698 |
| hERG Blockers | 0 | 0.001 | 0.014 | 0 | 0 | 0 | 0 | 0.033 | 0.009 | 0.009 | 0 | 0 |
